# Supplementary material
Source: PubMed Central journal article supplement (PMC5135272)
Supplement: jciinsight-1-90220-s001.pdf [file jciinsight-1-90220-s001.pdf]

# **Low dose dasatinib rescues cardiac function in Noonan syndrome**

Jae-Sung Yi<sup>1</sup>, Yan Huang<sup>2</sup>, Andrea T. Kwaczala<sup>3</sup>, Ivana Y. Kuo<sup>1</sup>, Barbara E. Ehrlich<sup>1</sup>,  
Stuart G. Campbell<sup>3</sup>, Frank J. Giordano<sup>2</sup> and Anton M. Bennett<sup>1,4,\*</sup>

<sup>1</sup>Department of Pharmacology, <sup>2</sup>Department of Internal Medicine, <sup>3</sup>Department of Biomedical Engineering, <sup>4</sup>Program in Integrative Cell Signaling and Neurobiology of Metabolism, Yale School of Medicine, New Haven, CT 06520, USA.

## **Supplemental Data:**

Supplemental Figures: 1- 6

Supplemental Tables: 1-8

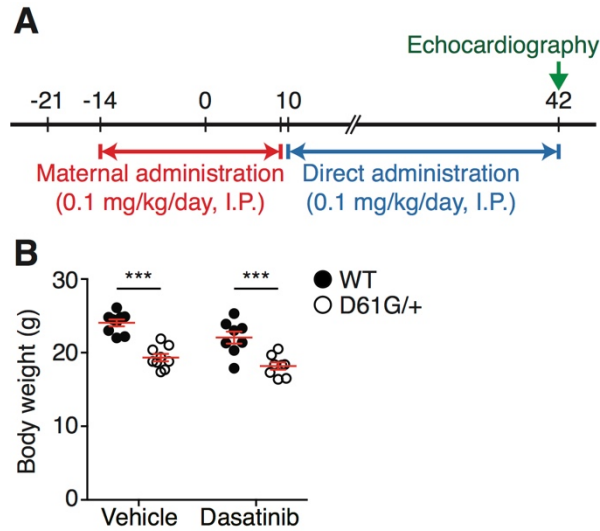

**Supplemental Figure 1. Prenatal dasatinib administration into NS mice. (A)** Dasatinib was injected i.p. (0.1 mg/kg body weight) into pregnant mice daily, beginning on gestational day 7.5 (E7.5) continuing (in nursing females) until postnatal day 9. Vehicle-injected mice served as a control. Beginning at P10, dasatinib or vehicle alone was injected (i.p.) directly into pups daily, until 6-weeks after birth. Functional cardiac parameters were examined by echocardiography at P42 (**Supplemental Table 4**). **(B)** Body weight were measured at P42. ( $n = 9$  for vehicle-treated WT mice;  $n = 9$  for vehicle-treated NS mice;  $n = 8$  for dasatinib-treated WT mice;  $n = 8$  for dasatinib-treated NS mice). Data represent mean  $\pm$  SEM. Data were analyzed with two-way analysis of variance (ANOVA) and Tukey's multiple comparison test. \*\*\*,  $p < 0.001$ .

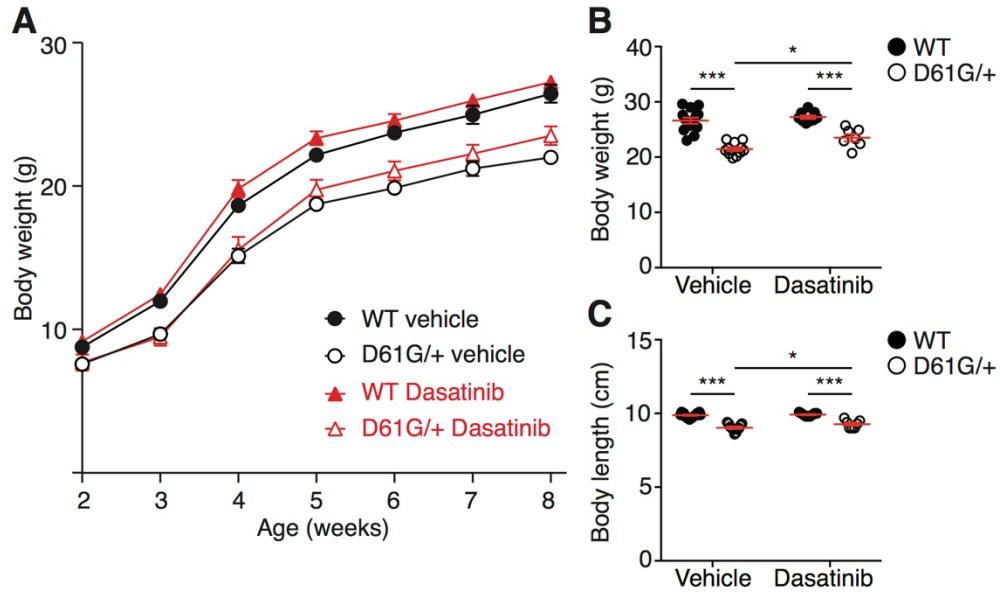

**Supplemental Figure 2. Postnatal dasatinib administration does not improve growth of NS mice.** (A) Growth curves of postnatal vehicle- or dasatinib-treated WT and NS mice (D61G/+). Differences within treatment groups were significant from 3- to 8-weeks. (B and C), body weight (B) and body length (C) were measured at P56 ( $n = 14$  for vehicle-treated WT mice;  $n = 11$  for vehicle-treated NS mice;  $n = 9$  for dasatinib-treated WT mice;  $n = 7$  for dasatinib-treated NS mice). Data represent mean  $\pm$  SEM. Data were analyzed with two-way analysis of variance (ANOVA) and Tukey's multiple comparison test. \*\*\*,  $p < 0.001$ .

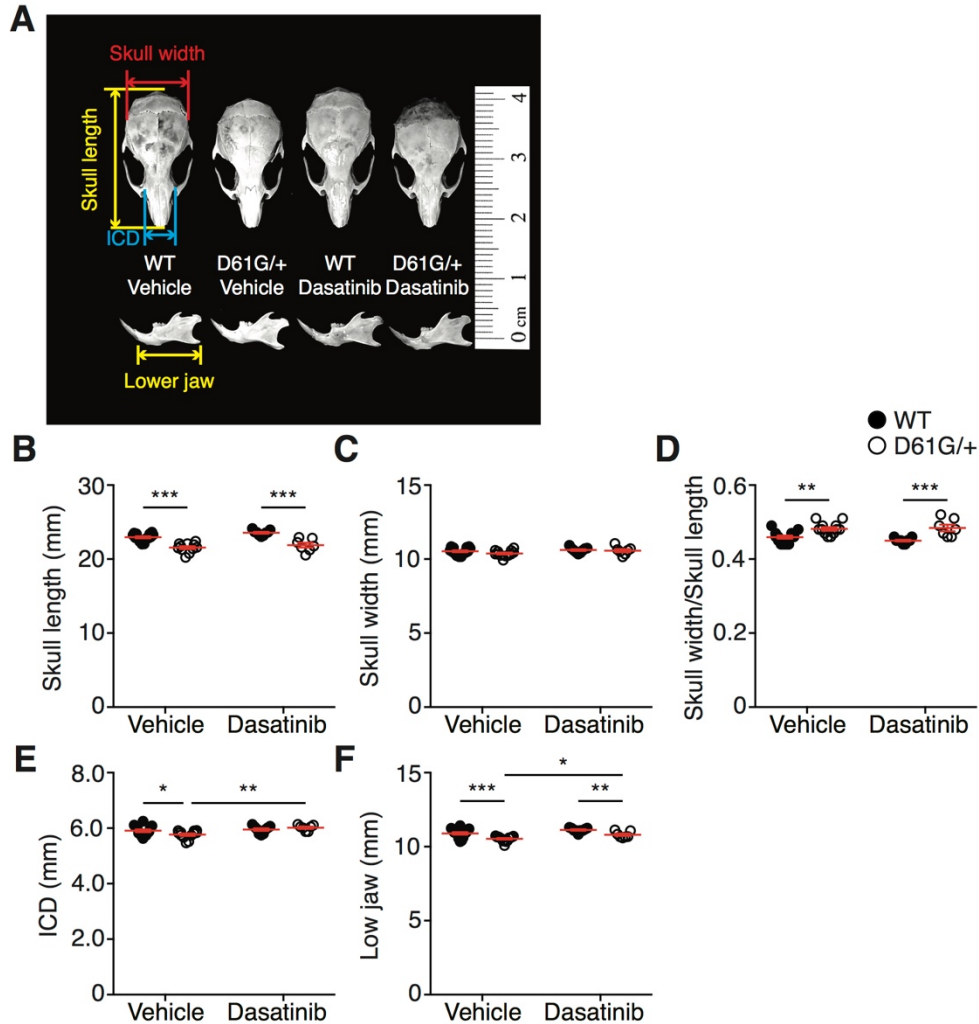

**Supplemental Figure 3. No effect on facial dysmorphic features in dasatinib-treated NS mice.**

(A) Representative images of the skull and the lower jaw from postnatally vehicle- or dasatinib-treated WT and NS mice (D61G/+) at P56. Measurements were obtained at the indicated points.

(B-F) Skull length (B), skull width (C), ratio of skull length to skull width (D), intercantal distance (ICD) (E) and lower jaw length (F) were measured ( $n = 14$  for vehicle-treated WT mice;  $n = 11$  for vehicle-treated NS mice;  $n = 9$  for dasatinib-treated WT mice;  $n = 7$  for dasatinib-treated NS mice). Graph data represent mean  $\pm$  SEM. Data were analyzed with two-way analysis of variance (ANOVA) and Tukey's multiple comparison test. \*\*,  $p < 0.01$ ; \*\*\*,  $p < 0.001$ .

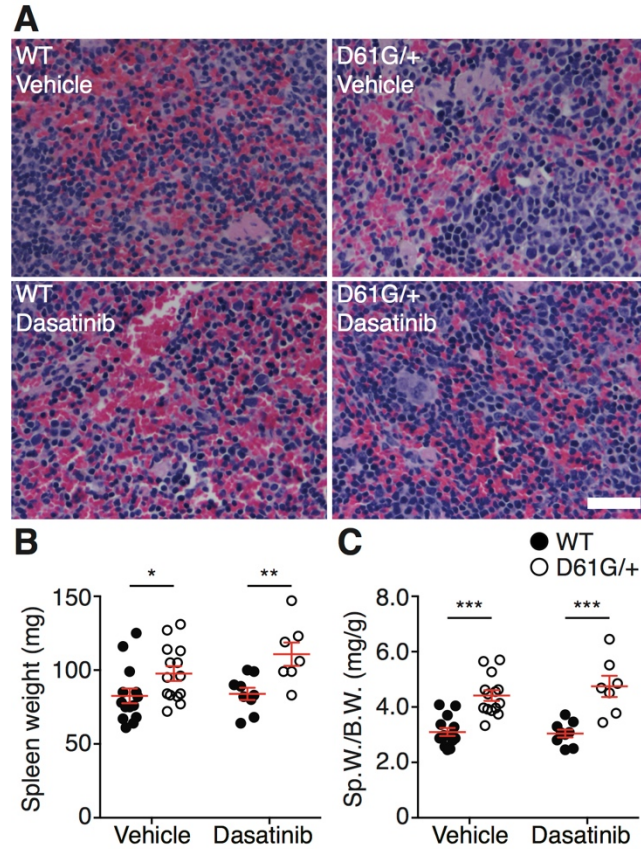

**Supplemental Figure 4. Spleen phenotypes in dasatinib-treated NS mice.** (A) Representative H&E-stained histological images of the spleen from postnatally vehicle- or dasatinib-treated WT and NS mice at P56 (bar = 50  $\mu$ m). (B-C) Spleen weight (B) and the ratio of spleen weight (Sp.W.) to body weight (B.W.) (C) were measured ( $n = 14$  for vehicle treated WT mice;  $n = 14$  for vehicle-treated NS mice;  $n = 9$  for dasatinib-treated WT mice;  $n = 7$  for dasatinib-treated NS mice). Graph data represent mean  $\pm$  SEM. Data were analyzed with two-way analysis of variance (ANOVA) and Tukey's multiple comparison test. \*\*\*,  $p < 0.001$ .

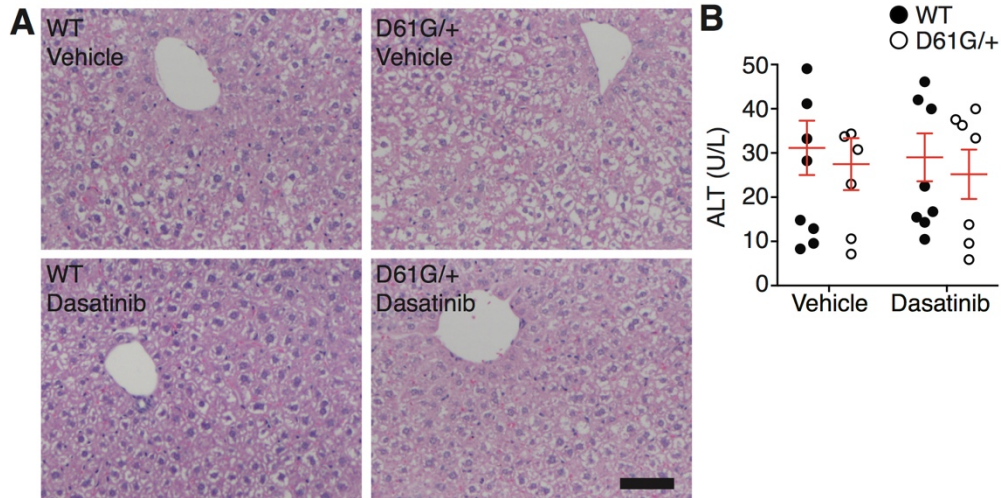

**Supplemental Figure 5. Liver phenotypes in dasatinib-treated NS mice.** (A) Representative H&E-stained histological images of the liver from postnatal vehicle- or dasatinib-treated WT and NS mice (D61G/+) at P56 (bar = 50  $\mu$ m). (B) The enzymatic activities of alanine aminotransferase (ALT) in serum were measured from vehicle- or dasatinib-treated WT and NS mice ( $n = 10$  for vehicle treated WT mice;  $n = 7$  for vehicle-treated NS mice;  $n = 9$  for dasatinib-treated WT mice;  $n = 7$  for dasatinib-treated NS mice). Graph data represent mean  $\pm$  SEM. Data were analyzed with two-way analysis of variance (ANOVA) and Tukey's multiple comparison test.

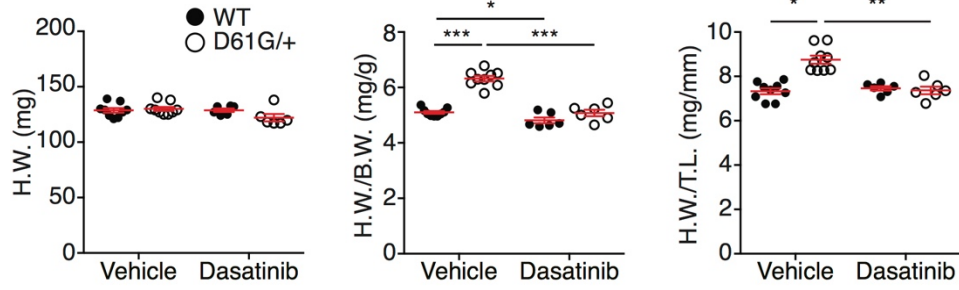

**Supplemental Figure 6. Gross morphological analysis of dasatinib treated NS mice heart.**

Heart weight (H.W.), the ratio of H.W. to body weight (B.W.) or tibialis length (T.L.) were measured from 8-week-old vehicle- or dasatinib treated WT and NS mice (D61G/+). Data were analyzed with two-way analysis of variance (ANOVA) and Tukey's multiple comparison test. \*,  $p < 0.05$ ; \*\*,  $p < 0.01$ ; \*\*\*,  $p < 0.001$ .

**Supplemental Table 1. Progeny from NS mice breeding.** NS male mice (*Ptpn11*<sup>D61G/+</sup>; B6129SF2/Tac background) were crossed with wild type B6129SF1/Tac female mice. Progeny were genotyped at postnatal day 10 (P10). Data were analyzed with chi-square goodness of fit test.

|          | WT  | <i>Ptpn11</i> <sup>D61G/+</sup> | <i>n</i> | $\chi^2$ | <i>p</i> |
|----------|-----|---------------------------------|----------|----------|----------|
| P10      | 135 | 108                             | 243      | 3.000    | 0.0833   |
| (Male)   | 66  | 51                              | 117      | 1.923    | 0.1655   |
| (Female) | 69  | 57                              | 126      | 1.143    | 0.2850   |



**Supplemental Table 2. Echocardiography parameters of WT and NS mice (D61G/+).**

|                             | 3-weeks      |                           | 8-weeks      |                           |
|-----------------------------|--------------|---------------------------|--------------|---------------------------|
|                             | WT<br>(n=9)  | D61G/+<br>(n=9)           | WT<br>(n=9)  | D61G/+<br>(n=9)           |
| IVS,d (mm)                  | 0.56±0.02    | 0.70±0.02 <sup>***</sup>  | 0.66±0.01    | 0.65±0.02                 |
| IVS,s (mm)                  | 0.95±0.04    | 1.11±0.05 <sup>*</sup>    | 1.10±0.03    | 0.89±0.02                 |
| LVID,d (mm)                 | 3.33±0.06    | 2.95±0.06 <sup>***</sup>  | 3.86±0.03    | 3.86±0.03                 |
| LVID,s (mm)                 | 2.22±0.04    | 1.90±0.06 <sup>***</sup>  | 2.43±0.05    | 2.95±0.08 <sup>***</sup>  |
| LVPW,d (mm)                 | 0.60±0.02    | 0.72±0.02 <sup>***</sup>  | 0.76±0.01    | 0.75±0.01                 |
| LVPW,s (mm)                 | 0.84±0.10    | 0.95±0.04 <sup>*</sup>    | 1.16±0.02    | 0.98±0.01 <sup>*</sup>    |
| LV vol,d (mm <sup>3</sup> ) | 45.30±1.96   | 33.88±1.78 <sup>***</sup> | 64.53±1.05   | 64.65±1.29                |
| LV vol,s (mm <sup>3</sup> ) | 16.60±0.79   | 11.30±0.90 <sup>***</sup> | 20.93±0.38   | 30.99±0.97 <sup>**</sup>  |
| %EF                         | 63.28±1.26   | 66.74±1.72                | 68.88±1.36   | 49.80±1.81 <sup>**</sup>  |
| %FS                         | 33.42±0.90   | 35.72±1.24                | 36.80±0.62   | 26.72±0.56 <sup>***</sup> |
| LV mass (mg)                | 54.65±1.85   | 59.64±1.24 <sup>*</sup>   | 90.97±5.51   | 89.88±7.37                |
| Heart rate (bpm)            | 430.00±20.31 | 466.67±14.46              | 468.75±18.61 | 446.50±28.65              |

Data represents the mean ± SEM. \*,  $p < 0.05$ ; \*\*,  $p < 0.01$ ; \*\*\*,  $p < 0.001$  denotes significance compared with the same aged WT mice. All  $p$  values were derived using unpaired Student's  $t$ -test. IVS, Interventricular septum wall thickness; LVID, left ventricular internal dimension; LVPW, left ventricular posterior wall thickness; LV vol, left ventricle volume; EF, ejection fraction; FS, fractional shortening; LV mass, left ventricular mass; d, diastole; s, systole; bpm, beat per minute.

**Supplemental Table 3. Progeny from prenatal dasatinib-treated *Ptpn11*<sup>D61G/+</sup> mice.** NS male mice (*Ptpn11*<sup>D61G/+</sup>; B6129SF2/Tac background) were crossed with wild type B6129SF1/Tac female mice. Pregnant female mice were treated with 0.1 mg/kg of Dasatinib from E7.5 until postnatal day 9. Data are shown for the number of viable pups at postnatal day 10.

|                          | WT | <i>Ptpn11</i> <sup>D61G/+</sup> | Dead pup |
|--------------------------|----|---------------------------------|----------|
| Vehicle                  | 21 | 20                              | -        |
| Dasatinib<br>(0.1 mg/kg) | 25 | 19                              | 4        |

**Supplemental Table 4. Echocardiography parameters of *in utero* for vehicle- or dasatinib-treated WT and NS mice (D61G/+) at P42.**

|                             | Vehicle      |                 | Dasatinib    |                 |
|-----------------------------|--------------|-----------------|--------------|-----------------|
|                             | WT<br>(n=9)  | D61G/+<br>(n=9) | WT<br>(n=8)  | D61G/+<br>(n=8) |
| IVS,d (mm)                  | 0.69±0.06    | 0.57±0.03       | 0.67±0.04    | 0.65±0.06       |
| IVS,s (mm)                  | 1.10±0.06    | 1.01±0.06       | 1.08±0.09    | 0.97±0.10       |
| LVID,d (mm)                 | 3.95±0.15    | 3.55±0.10       | 3.93±0.08    | 3.61±0.12       |
| LVID,s (mm)                 | 2.45±0.19    | 3.01±0.07**     | 2.49±0.09    | 2.32±0.12††     |
| LVPW,d (mm)                 | 0.74±0.03    | 0.78±0.02       | 0.76±0.05    | 0.70±0.04       |
| LVPW,s (mm)                 | 1.23±0.08    | 0.97±0.06*      | 1.13±0.04    | 1.12±0.07       |
| LV vol,d (mm <sup>3</sup> ) | 68.02±4.23   | 55.82±2.96      | 67.51±2.54   | 60.93±3.75      |
| LV vol,s (mm <sup>3</sup> ) | 20.15±3.15   | 30.65±1.18**    | 22.26±1.95   | 24.21±1.56      |
| %EF                         | 66.84±1.43   | 43.30±3.38**    | 64.24±2.52   | 62.62±2.75††    |
| %FS                         | 36.22±1.21   | 25.84±3.01**    | 34.70±1.82   | 34.29±2.09††    |
| LV mass (mg)                | 78.62±5.81   | 76.14±5.28      | 76.70±4.50   | 63.54±9.58      |
| Heart rate (bpm)            | 457.88±26.89 | 390.386±25.07   | 474.88±24.08 | 440.58±29.39    |

Data represents the mean ± SEM. \*,  $p < 0.05$ ; \*\*,  $p < 0.01$  denotes significance compared with the vehicle treated WT mice. ††,  $p < 0.01$  denotes significance compared with the vehicle-treated *Ptpn11<sup>D61G/+</sup>* mice. All  $p$  values were derived using two-way analysis of variance (ANOVA) and Tukey's multiple comparison test. IVS, Interventricular septum wall thickness; LVID, left ventricular internal dimension; LVPW, left ventricular posterior wall thickness; LV vol, left ventricle volume; EF, ejection fraction; FS, fractional shortening; LV mass, left ventricular mass; d, diastole; s, systole; bpm, beat per minute.

**Supplemental Table 5. Echocardiography parameters of post-developmental vehicle- or dasatinib-treated WT and NS mice (D61G/+) at P42.**

|                             | Vehicle      |                 | Dasatinib    |                         |
|-----------------------------|--------------|-----------------|--------------|-------------------------|
|                             | WT<br>(n=7)  | D61G/+<br>(n=6) | WT<br>(n=6)  | D61G/+<br>(n=6)         |
| IVS,d (mm)                  | 0.65±0.06    | 0.54±0.04       | 0.71±0.05    | 0.66±0.05               |
| IVS,s (mm)                  | 1.06±0.06    | 1.02±0.09       | 1.13±0.06    | 1.04±0.07               |
| LVID,d (mm)                 | 3.83±0.17    | 3.55±0.13       | 3.80±0.11    | 3.63±0.07               |
| LVID,s (mm)                 | 2.36±0.18    | 2.96±0.07**     | 2.45±0.05    | 2.50±0.08 <sup>†</sup>  |
| LVPW,d (mm)                 | 0.72±0.03    | 0.77±0.02       | 0.81±0.04    | 0.71±0.03               |
| LVPW,s (mm)                 | 1.19±0.07    | 0.95±0.05*      | 1.25±0.07    | 1.09±0.06               |
| LV vol,d (mm <sup>3</sup> ) | 68.43±6.10   | 56.10±4.28      | 65.87±2.78   | 57.35±2.19              |
| LV vol,s (mm <sup>3</sup> ) | 20.15±3.73   | 30.90±1.73**    | 22.24±0.63   | 24.67±1.18              |
| %EF                         | 65.11±2.42   | 46.44±5.16**    | 65.70±0.82   | 60.93±2.06 <sup>†</sup> |
| %FS                         | 35.04±1.69   | 24.39±2.92**    | 35.52±0.69   | 33.08±1.33 <sup>†</sup> |
| LV mass (mg)                | 80.72±6.62   | 79.54±4.79      | 80.66±3.56   | 67.05±3.86              |
| Heart rate (bpm)            | 458.00±36.55 | 375.67±16.49*   | 476.33±21.10 | 427.17±10.06            |

Data represents the mean ± SEM. \*,  $p < 0.05$ ; \*\*,  $p < 0.01$  denotes significance compared with the vehicle treated WT mice. <sup>†</sup>,  $p < 0.05$  denotes significance compared with the vehicle-treated *Ptpn11*<sup>D61G/+</sup> mice. All  $p$  values were derived using two-way analysis of variance (ANOVA) and Tukey's multiple comparison test. IVS, Interventricular septum wall thickness; LVID, left ventricular internal dimension; LVPW, left ventricular posterior wall thickness; LV vol, left ventricle volume; EF, ejection fraction; FS, fractional shortening; LV mass, left ventricular mass; d, diastole; s, systole; bpm, beat per minute.

**Supplemental Table 6. Echocardiography parameters of post-developmental vehicle- or dasatinib-treated WT and NS mice (D61G/+) at P56.**

|                             | Vehicle      |                           | Dasatinib    |                          |
|-----------------------------|--------------|---------------------------|--------------|--------------------------|
|                             | WT (n=9)     | D61G/+ (n=9)              | WT (n=6)     | D61G/+ (n=6)             |
| IVS,d (mm)                  | 0.71±0.03    | 0.69±0.05                 | 0.69±0.03    | 0.72±0.04                |
| IVS,s (mm)                  | 1.17±0.10    | 1.01±0.04                 | 1.19±0.06    | 1.18±0.05                |
| LVID,d (mm)                 | 3.86±0.08    | 3.86±0.10                 | 3.92±0.09    | 3.93±0.08                |
| LVID,s (mm)                 | 2.43±0.06    | 2.95±0.10 <sup>***</sup>  | 2.52±0.10    | 2.60±0.07 <sup>†</sup>   |
| LVPW,d (mm)                 | 0.78±0.02    | 0.77±0.04                 | 0.80±0.06    | 0.65±0.03                |
| LVPW,s (mm)                 | 1.22±0.05    | 0.96±0.04 <sup>***</sup>  | 1.18±0.05    | 1.19±0.05 <sup>†</sup>   |
| LV vol,d (mm <sup>3</sup> ) | 69.38±3.40   | 69.22±5.22                | 64.06±2.65   | 65.60±2.44               |
| LV vol,s (mm <sup>3</sup> ) | 20.21±1.05   | 32.80±2.76 <sup>***</sup> | 23.06±2.21   | 24.85±1.68 <sup>†</sup>  |
| %EF                         | 68.72±2.09   | 50.92±2.50 <sup>***</sup> | 65.89±1.74   | 64.71±1.67 <sup>††</sup> |
| %FS                         | 39.31±1.13   | 25.64±1.53 <sup>***</sup> | 36.63±1.20   | 34.92±1.23 <sup>††</sup> |
| LV mass (mg)                | 88.38±5.62   | 89.88±7.38                | 80.04±4.26   | 74.90±3.70               |
| Heart rate (bpm)            | 450.00±24.92 | 433.67±28.34              | 495.83±19.60 | 457.83±13.17             |

Data represents the mean ± SEM. \*\*,  $p < 0.01$ ; \*\*\*,  $p < 0.001$  denotes significance compared with the vehicle treated WT mice. †,  $p < 0.05$ ; ††,  $p < 0.01$ ; †††,  $p < 0.001$  denotes significance compared with the vehicle-treated *Ptpn11*<sup>D61G/+</sup> mice. All  $p$  values were derived using two-way analysis of variance (ANOVA) and Tukey's multiple comparison test. IVS, Interventricular septum wall thickness; LVID, left ventricular internal dimension; LVPW, left ventricular posterior wall thickness; LV vol, left ventricle volume; EF, ejection fraction; FS, fractional shortening; LV mass, left ventricular mass; d, diastole; s, systole; bpm, beat per minute.

**Supplemental Table 7. Hemodynamic analysis parameters of post-developmental vehicle- or dasatinib-treated WT and NS mice (D61G/+) at P56.**

|                                   | Vehicle     |                 | Dasatinib   |                        |
|-----------------------------------|-------------|-----------------|-------------|------------------------|
|                                   | WT<br>(n=8) | D61G/+<br>(n=9) | WT<br>(n=7) | D61G/+<br>(n=9)        |
| Systolic pressure<br>(mmHg)       | 142.2±9.3   | 102.8±3.1***    | 146.2±5.1   | 129.3±6.2 <sup>†</sup> |
| Diastolic pressure<br>(mmHg)      | 89.1±5.0    | 61.8±2.2***     | 95.1±4.2    | 84.0±3.5 <sup>††</sup> |
| Pulse pressure<br>(mmHg)          | 67.2±5.3    | 53.0±1.5        | 65.2±4.6    | 63.7±4.4               |
| Mean arterial pressure<br>(mmHg)  | 106.8±6.3   | 75.5±2.4***     | 112.1±4.0   | 96.8±4.2 <sup>††</sup> |
| Left ventricle pressure<br>(mmHg) | 137.9±8.0   | 105.6±3.6**     | 136.5±2.5   | 127.9±4.5 <sup>†</sup> |
| End diastolic pressure<br>(mmHg)  | 7.8±1.8     | 10.5±0.9        | 8.7±1.3     | 11.1±0.7               |
| +dP/dp (mmHg/s)                   | 8497±556    | 5850±282**      | 8626±476    | 7718±498 <sup>†</sup>  |
| -dP/dt (mmHg/s)                   | -6075±235   | -5354±538       | -6529±847   | -6189±626              |

Data represents the mean ± SEM. \*\*,  $p < 0.01$ ; \*\*\*,  $p < 0.001$  denotes significance compared with the vehicle treated WT mice. <sup>†</sup>,  $p < 0.05$ ; <sup>††</sup>,  $p < 0.01$  denotes significance compared with the vehicle-treated *Ptpn11*<sup>D61G/+</sup> mice. All  $p$  values were derived using two-way analysis of variance (ANOVA) and Tukey's multiple comparison test.

**Supplemental Table 8. Ca<sup>2+</sup> excitation-contraction coupling parameters of cardiomyocytes isolated from the heart of post-developmental vehicle- or dasatinib-treated WT and NS mice (D61G/+) at P56.**

|                                                        | Vehicle                          |                                      | Dasatinib                        |                                      |
|--------------------------------------------------------|----------------------------------|--------------------------------------|----------------------------------|--------------------------------------|
|                                                        | WT<br>(n=131 cell,<br>n= 3 mice) | D61G/+<br>(n=128 cells,<br>n=3 mice) | WT<br>(n=111 cells,<br>n=3 mice) | D61G/+<br>(n=162 cells,<br>n=3 mice) |
| Diastolic Ca <sup>2+</sup> (Min F <sub>340/380</sub> ) | 1.05±0.01                        | 1.00±0.01 <sup>***</sup>             | 0.94±0.01 <sup>***</sup>         | 0.98±0.01                            |
| Systolic Ca <sup>2+</sup> (Max F <sub>340/380</sub> )  | 1.21±0.01                        | 1.24±0.01                            | 1.06±0.01 <sup>***</sup>         | 1.12±0.01 <sup>†††</sup>             |
| Rmag Ca <sup>2+</sup> (ΔF <sub>340/380</sub> )         | 0.16±0.01                        | 0.25±0.01 <sup>***</sup>             | 0.11±0.01 <sup>***</sup>         | 0.14±0.01 <sup>†††</sup>             |
| Ca <sup>2+</sup> TTP (ms, F <sub>340/380</sub> )       | 42.99±0.95                       | 40.41±0.76                           | 42.75±1.21                       | 43.22±0.90                           |
| Tau Ca <sup>2+</sup> (ms)                              | 109.18±2.67                      | 123.13±1.88 <sup>***</sup>           | 105.85±2.35                      | 116.52±2.36                          |
| Peak Shortening (%)                                    | 5.22±0.19                        | 4.09±0.20 <sup>***</sup>             | 6.04±0.23 <sup>*</sup>           | 6.59±0.18 <sup>†††</sup>             |
| Shortening TTP (ms)                                    | 64.45±0.82                       | 67.75±0.97 <sup>*</sup>              | 71.52±0.90 <sup>***</sup>        | 69.32±0.79                           |
| Shortening RT50 (ms)                                   | 35.20±0.70                       | 38.74±1.03 <sup>*</sup>              | 41.11±0.96 <sup>***</sup>        | 37.02±0.62 <sup>†</sup>              |
| Shortening RT90 (ms)                                   | 96.47±3.60                       | 112.16±4.35 <sup>*</sup>             | 113.38±4.18 <sup>*</sup>         | 99.24±3.23                           |

Data represents the mean ± SEM. \*,  $p < 0.05$ ; \*\*\*,  $p < 0.001$  denotes significance compared with the vehicle treated WT mice. †,  $p < 0.05$ ; †††,  $p < 0.001$  denotes significance compared with the vehicle-treated *Ptpn11*<sup>D61G/+</sup> mice. All  $p$  values were derived using two-way analysis of variance (ANOVA) and Tukey's multiple comparison test. TTP, Time to peak; RT50, Time from peak tension to 50% relaxation; RT90, Time from peak tension to 90% relaxation.
